# Supplementary material
Source: ML conference proceedings conference paper supplement (https://openreview.net/forum?id=Ae9uoV8FCz)

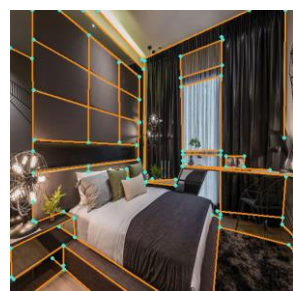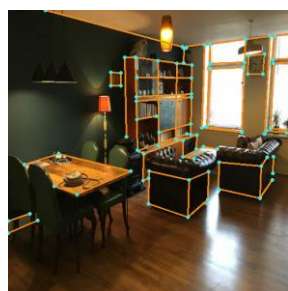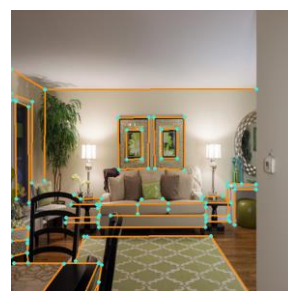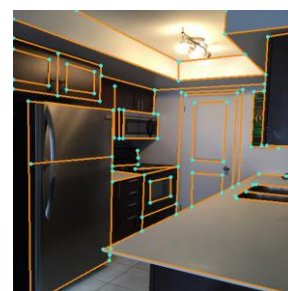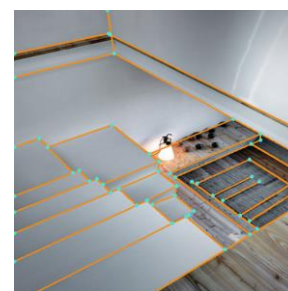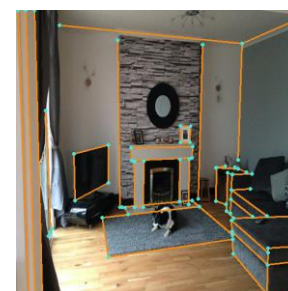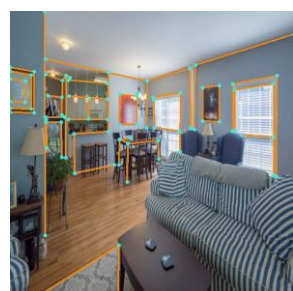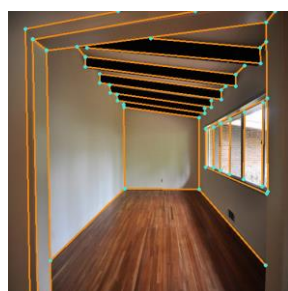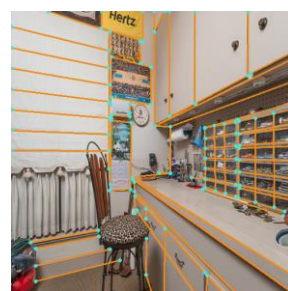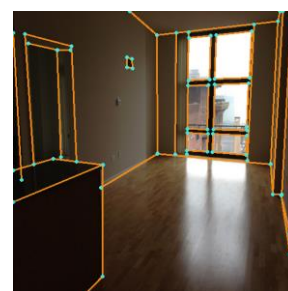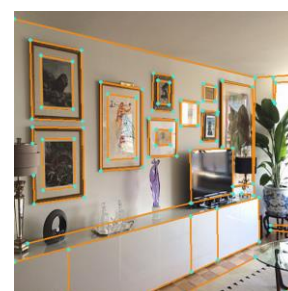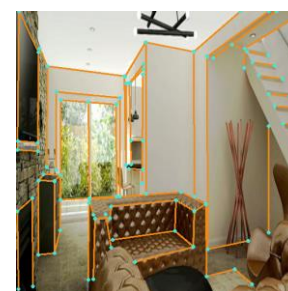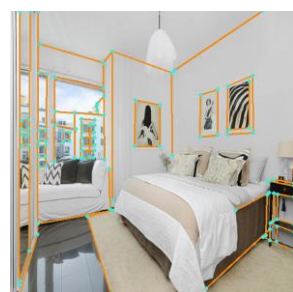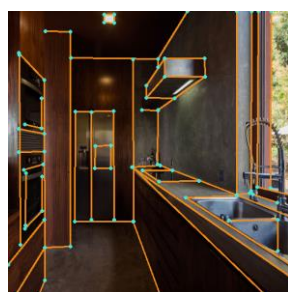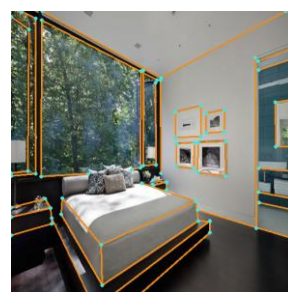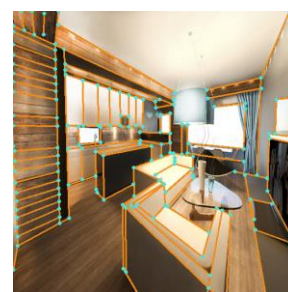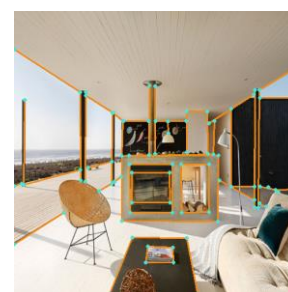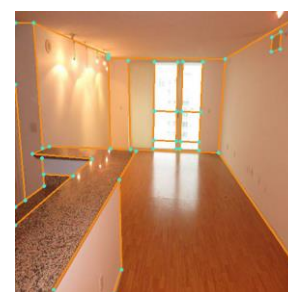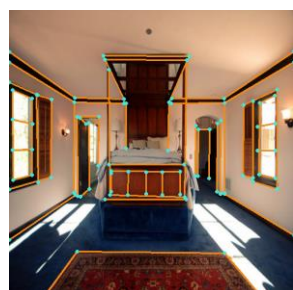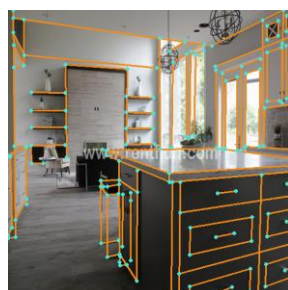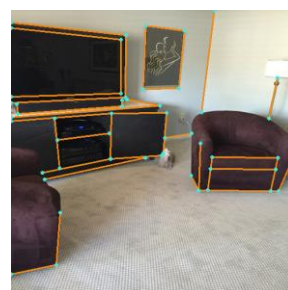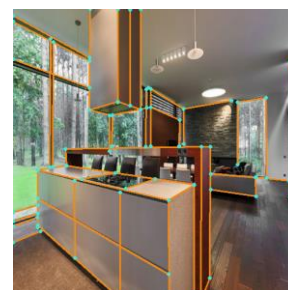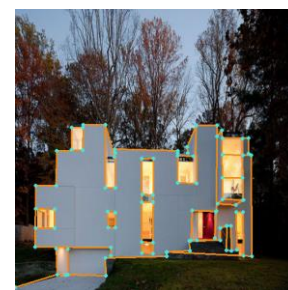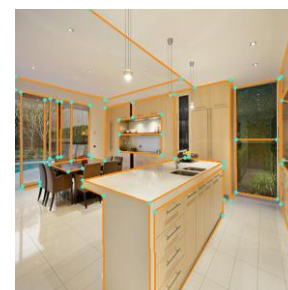

Supplement: supplementary_material [file supp_show.pdf › RANK++LETR/supp_show.pdf]
